# Supplementary material for: Phylum-Level Conservation of Regulatory Information in Nematodes despite Extensive Non-coding Sequence Divergence
Source: PubMed Central journal article supplement (PMC4447282; doi:10.1371/journal.pgen.1005268), 2015-05-28
Supplement: pgen.1005268.s001.pdf [file pgen.1005268.s001.pdf]

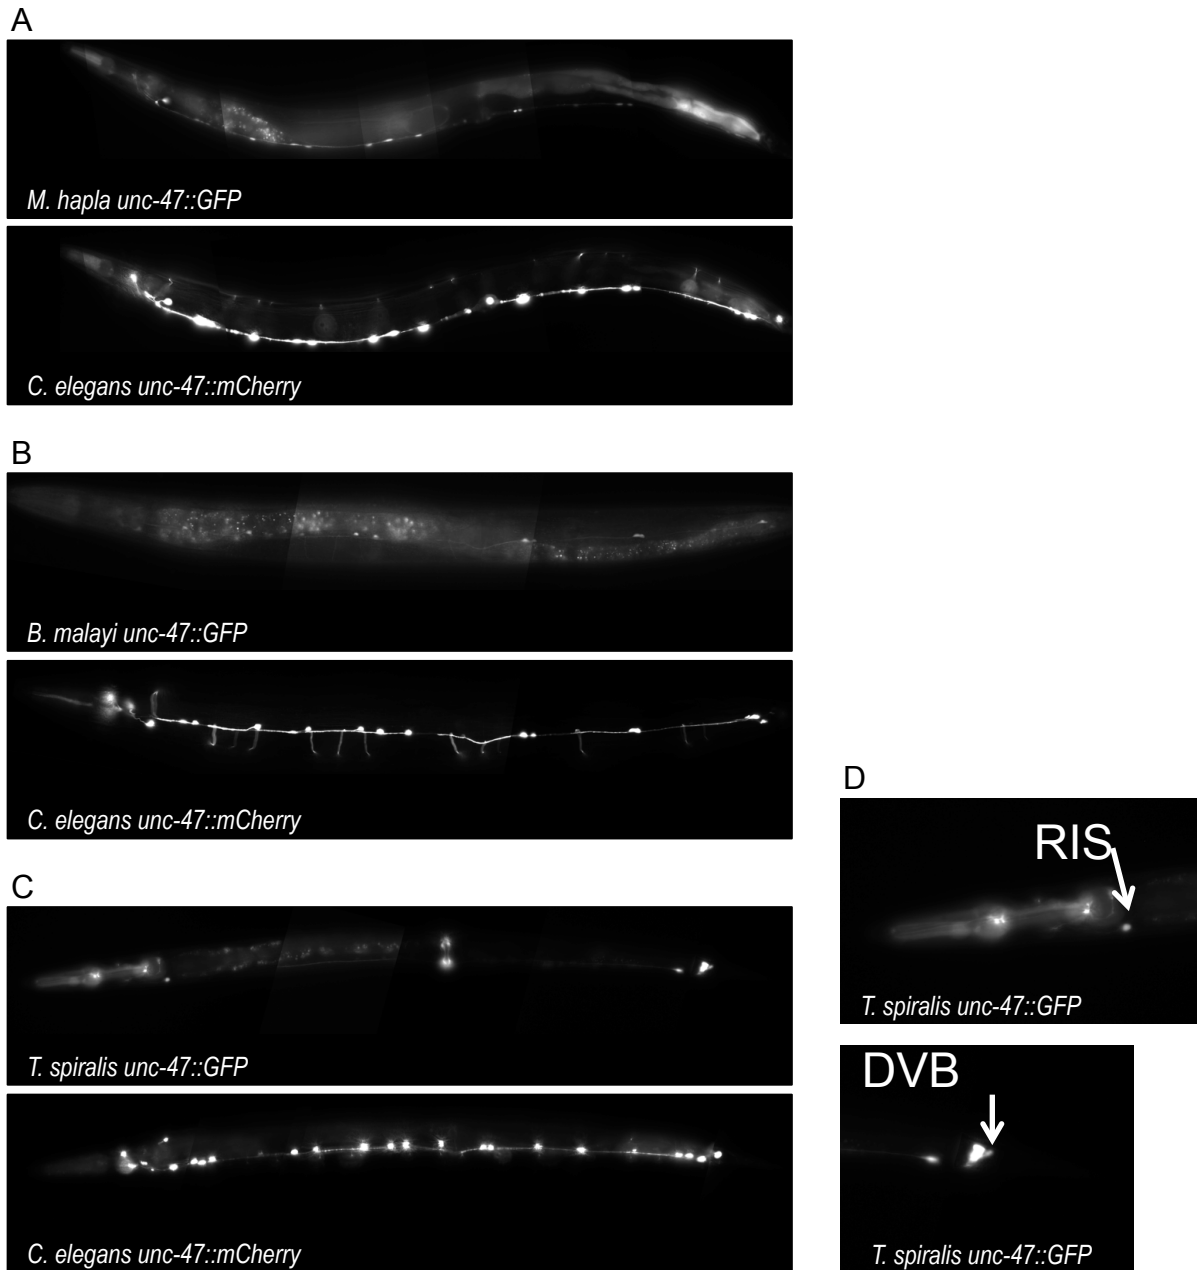

**S1 Figure. Expression patterns directed by diverse *unc-47* regulatory sequences in *C. elegans*.** (A-C) *C. elegans unc-47* regulatory sequence drives expression of *mCherry* in all transgenic strains; (A) *M. hapla*, (B) *B. malayi*, (C) *T. spiralis unc-47* regulatory sequences drive expression of *GFP*. (D) *T. spiralis unc-47* element drives expression of *GFP* in RIS and DVB. Animals photographed at 400x magnification. Images are mosaics of single animals.
