# Supplementary material for: Phylum-Level Conservation of Regulatory Information in Nematodes despite Extensive Non-coding Sequence Divergence
Source: PubMed Central journal article supplement (PMC4447282; doi:10.1371/journal.pgen.1005268), 2015-05-28
Supplement: pgen.1005268.s002.pdf [file pgen.1005268.s002.pdf]

A

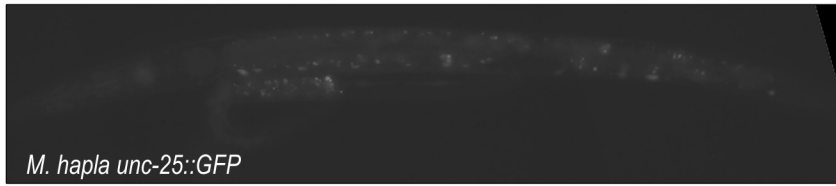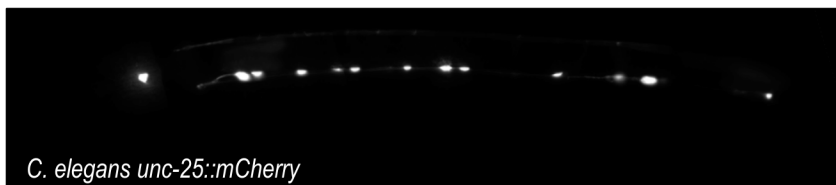

B

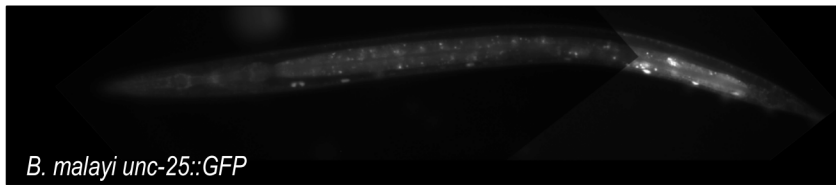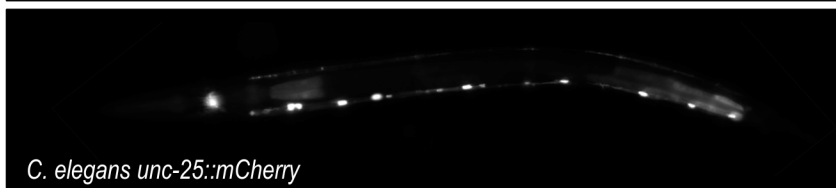

C

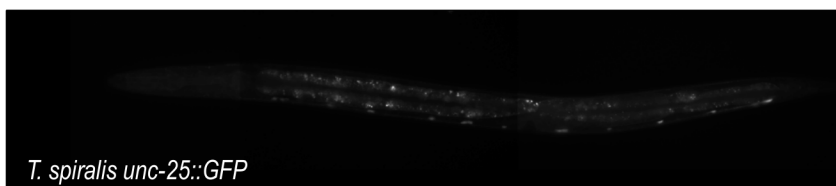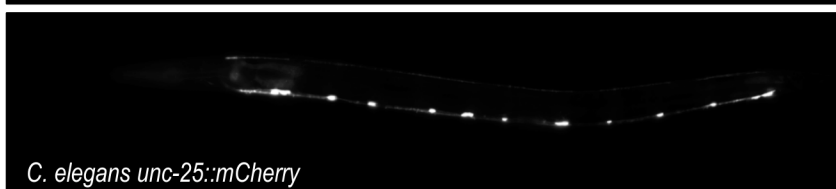

**S2 Figure. Expression patterns directed by diverse *unc-25* regulatory sequences in *C. elegans*.** (A-C) *C. elegans unc-25* regulatory sequence drives expression of *mCherry* in all transgenic strains; (A) *M. hapla*, (B) *B. malayi*, (C) *T. spiralis unc-25* regulatory sequences drive expression of *GFP*. Animals photographed at 400x magnification. Images are mosaics of single animals.
