# Supplementary material for: Phylum-Level Conservation of Regulatory Information in Nematodes despite Extensive Non-coding Sequence Divergence
Source: PubMed Central journal article supplement (PMC4447282; doi:10.1371/journal.pgen.1005268), 2015-05-28
Supplement: pgen.1005268.s003.pdf [file pgen.1005268.s003.pdf]

A

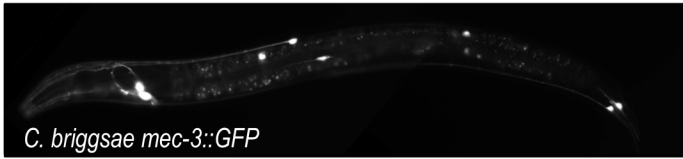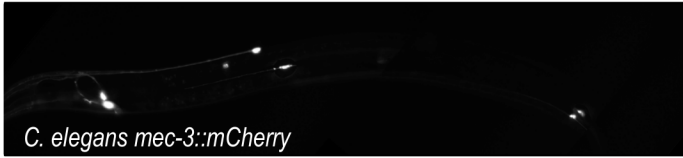

B

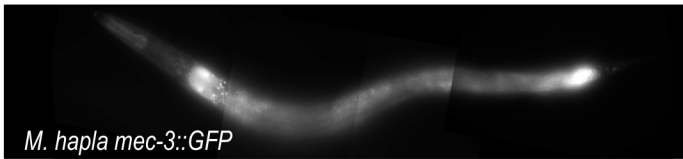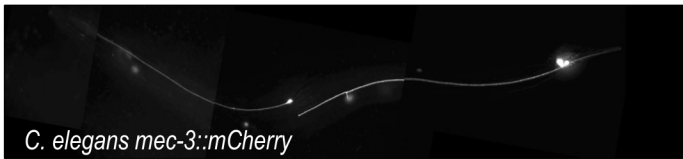

C

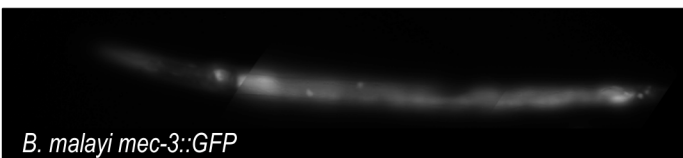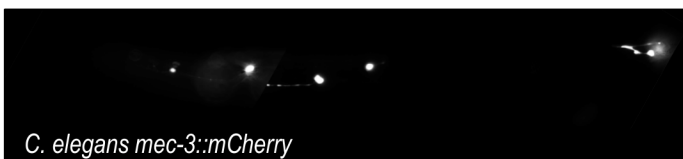

D

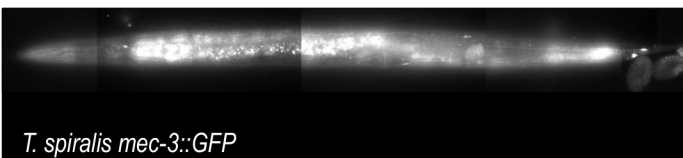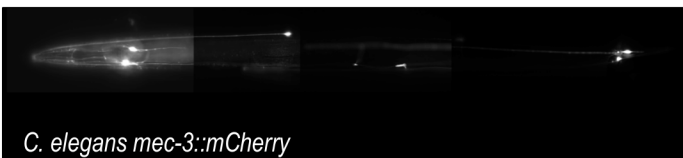

**S3 Figure.**  
**Expression patterns directed by diverse *mec-3* regulatory sequences in *C. elegans*.** (A-D) *C. elegans mec-3* regulatory sequence drives expression of *mCherry* in all transgenic strains; (A) *C. briggsae*, (B) *M. hapla*, (C) *B. malayi*, (D) *T. spiralis mec-3* regulatory sequences drive expression of *GFP*. Animals photographed at 400x magnification. Images are mosaics of single animals.
