# Supplementary material for: Phylum-Level Conservation of Regulatory Information in Nematodes despite Extensive Non-coding Sequence Divergence
Source: PubMed Central journal article supplement (PMC4447282; doi:10.1371/journal.pgen.1005268), 2015-05-28
Supplement: pgen.1005268.s004.pdf [file pgen.1005268.s004.pdf]

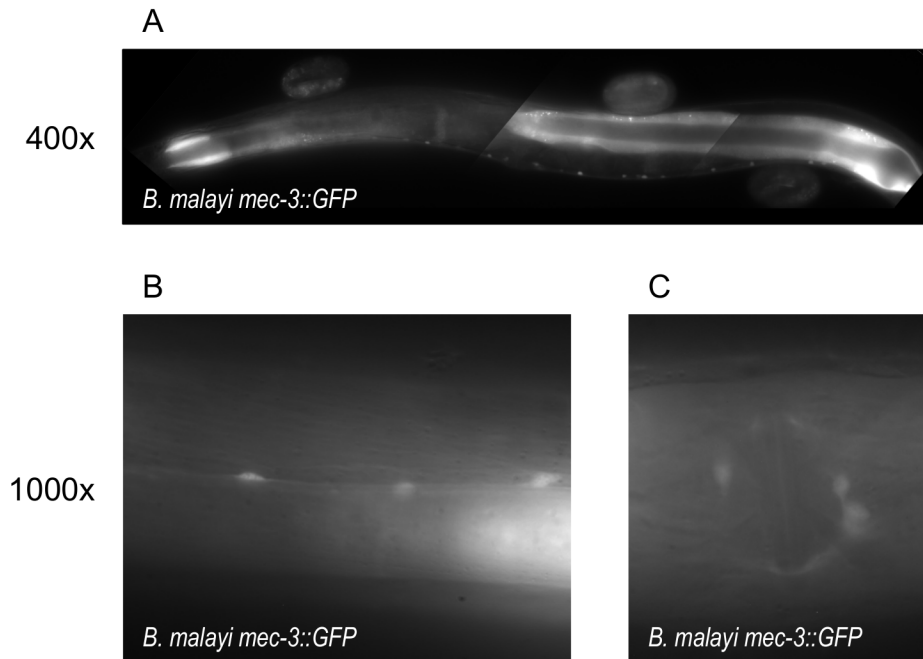

**S4 Figure. *B. malayi mec-3* regulatory sequence drives expression in ventral cord neurons.**

(A) *B. malayi mec-3* regulatory sequence drives expression of *GFP*. Animal photographed at 400x magnification, ventral cord at bottom. Image is a mosaic of single animals. (B) 1000x magnification of animal with ventral side up. (C) 1000x magnification of animal with ventral side up, vulva at center.
