# Supplementary material for: Phylum-Level Conservation of Regulatory Information in Nematodes despite Extensive Non-coding Sequence Divergence
Source: PubMed Central journal article supplement (PMC4447282; doi:10.1371/journal.pgen.1005268), 2015-05-28
Supplement: pgen.1005268.s005.pdf [file pgen.1005268.s005.pdf]

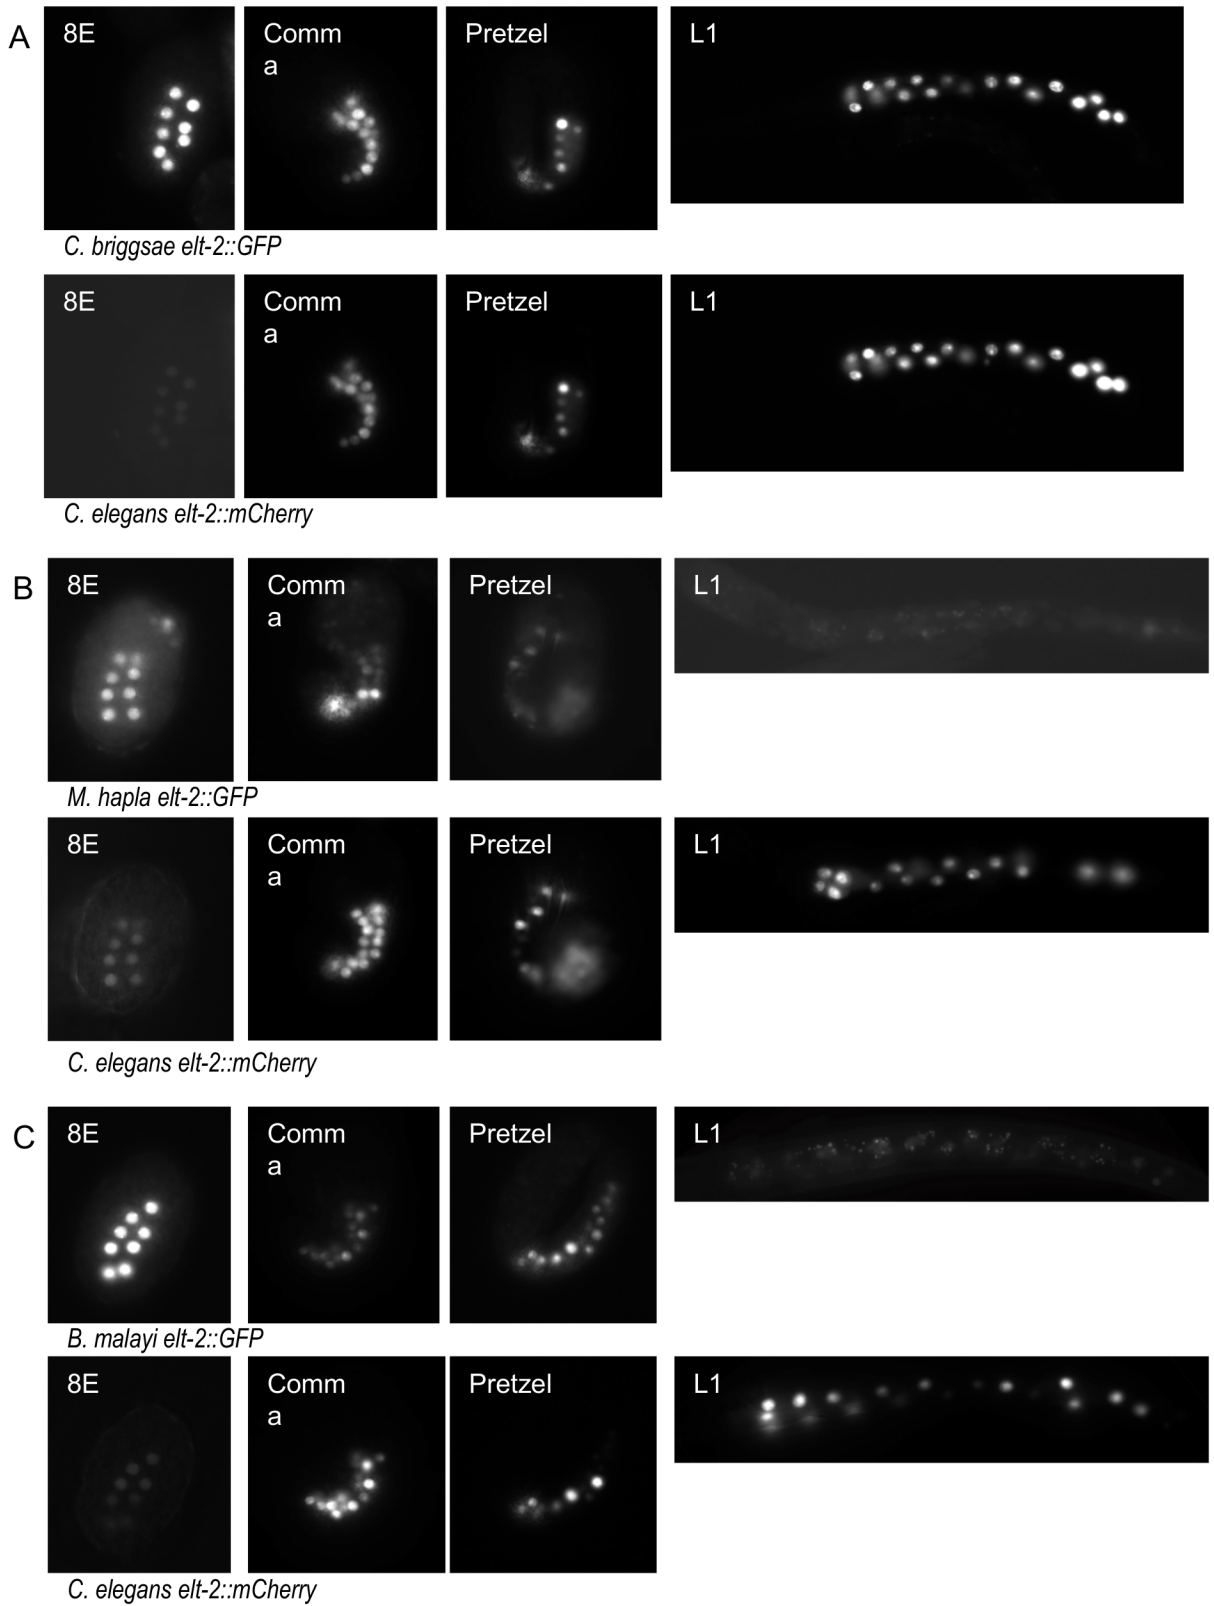

**S5 Figure. Expression patterns directed by diverse *elt-2* regulatory sequences in *C. elegans*. See legend next page.**

**S5 Figure. Expression patterns directed by diverse *elt-2* regulatory sequences in *C. elegans*.**

(A-C) *C. elegans unc-25* regulatory sequence drives expression of *mCherry* in all transgenic strains; (A) *C. briggsae*, (B) *M. hapla*, (C) *B. malayi elt-2* regulatory sequences drive expression of *GFP*. Stages shown are 8E, comma, and pretzel embryonic stages, with L1 larval stage below. Animals photographed at 400x magnification.
