# Supplementary material for: Phylum-Level Conservation of Regulatory Information in Nematodes despite Extensive Non-coding Sequence Divergence
Source: PubMed Central journal article supplement (PMC4447282; doi:10.1371/journal.pgen.1005268), 2015-05-28
Supplement: pgen.1005268.s010.pdf [file pgen.1005268.s010.pdf]

**Figure S10. Sequence coverage in orthologous upstream sequences is not greater than expected by chance.** See legend next page.

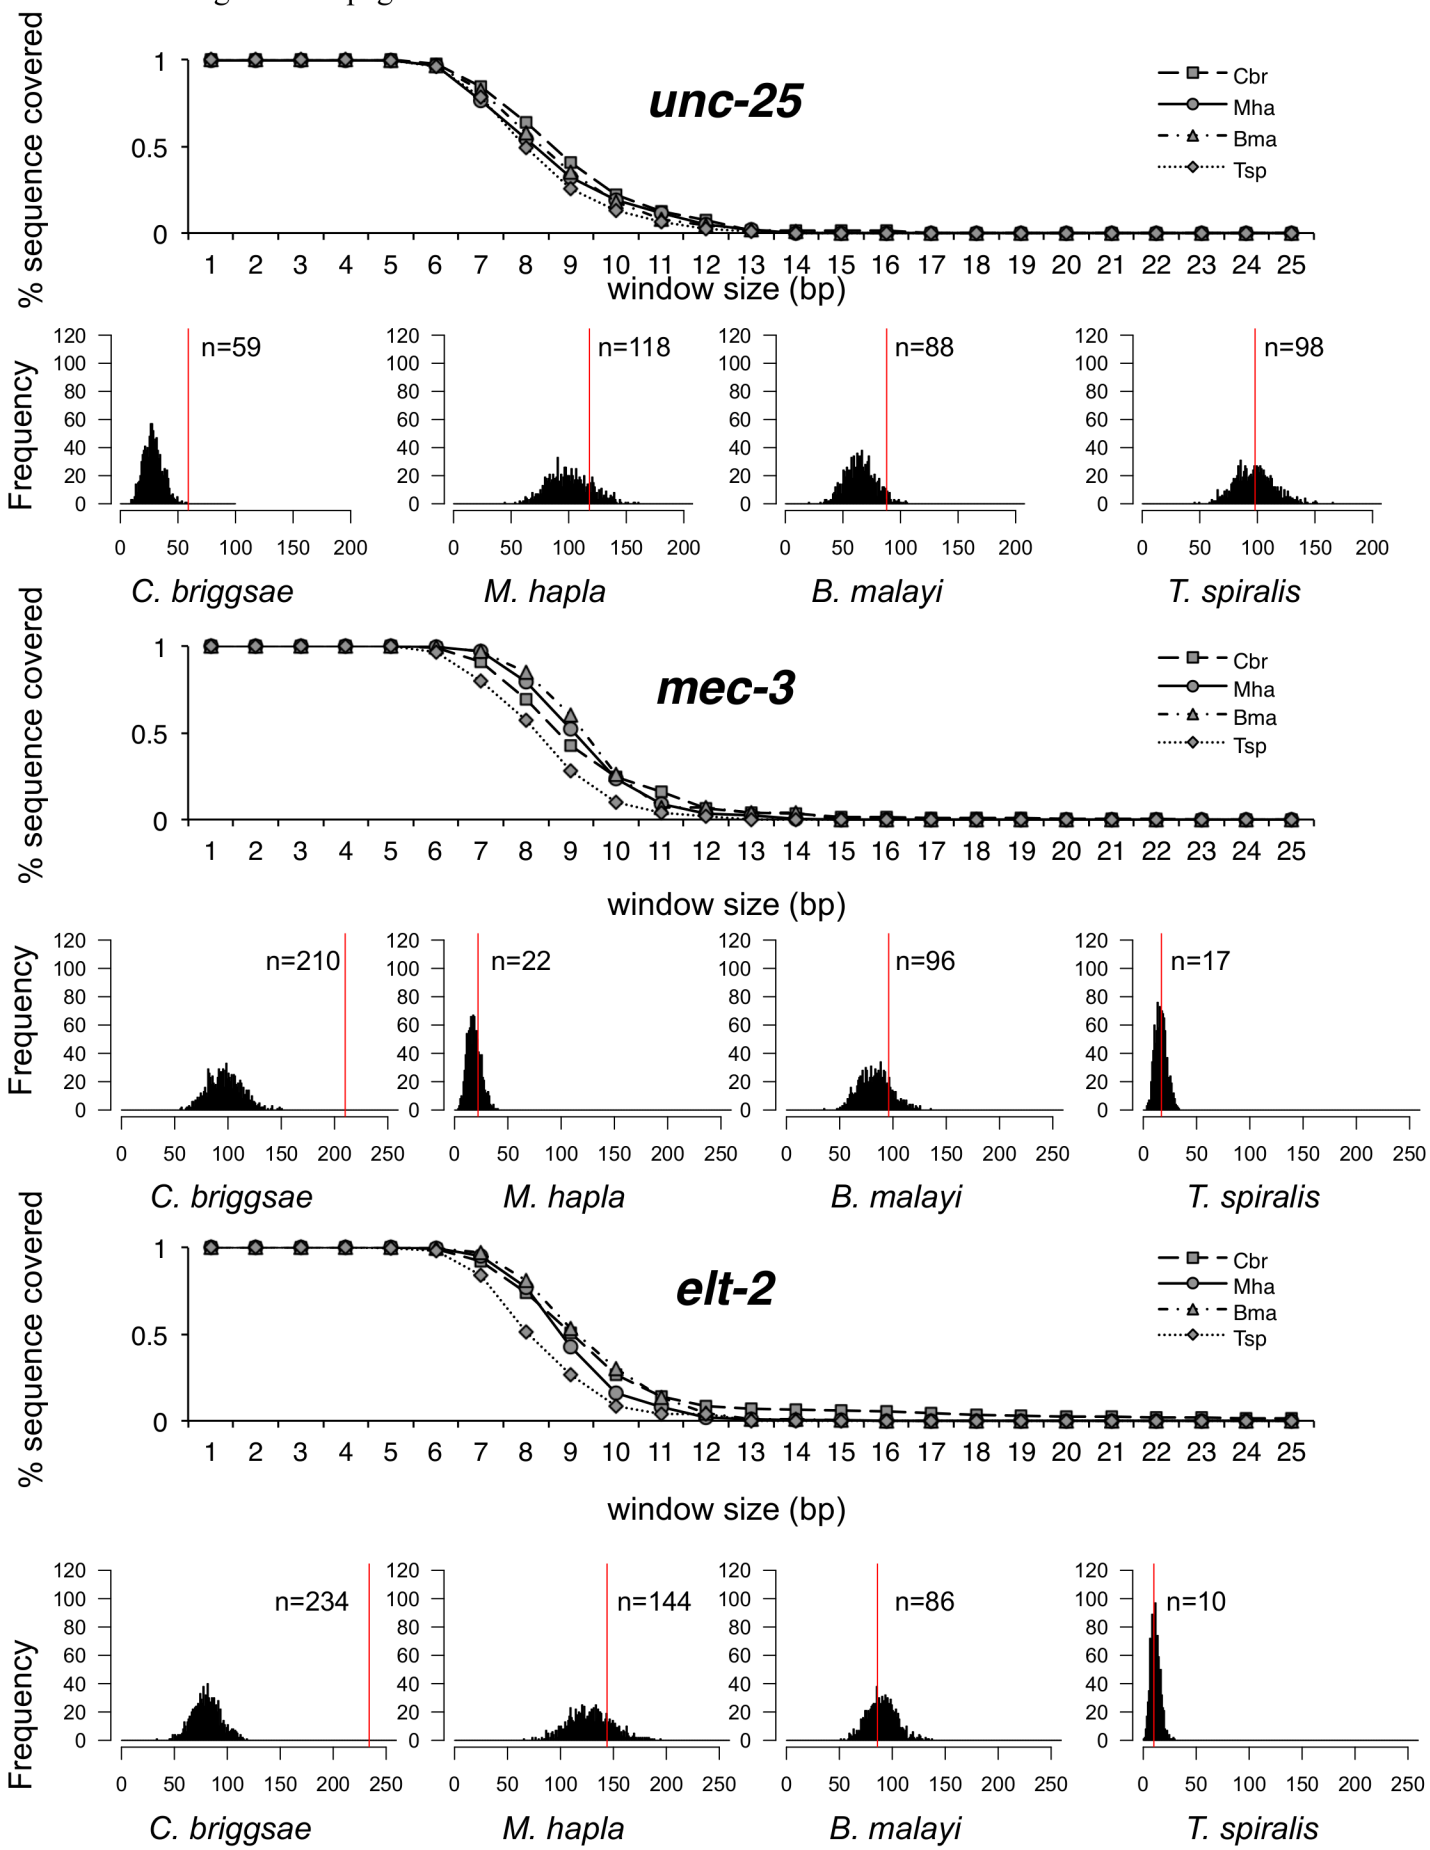

**S10 Figure. Sequence identity in orthologous upstream sequences is not greater than expected by chance.** Graphs showing the proportion of sequence similarity over different window sizes for *unc-25*, *mec-3*, and *elt-2*. The number of identical 10 nt blocks between each of the nematode relatives and the *C. elegans* upstream sequence of the same genes shown in red, on histograms showing the number of predicted 10 nt matches between the relatives' sequences and 1000 reshuffled *C. elegans* sequences that preserve tri-nucleotide frequencies.
