# Supplementary material for: Phylum-Level Conservation of Regulatory Information in Nematodes despite Extensive Non-coding Sequence Divergence
Source: PubMed Central journal article supplement (PMC4447282; doi:10.1371/journal.pgen.1005268), 2015-05-28
Supplement: pgen.1005268.s011.pdf [file pgen.1005268.s011.pdf]

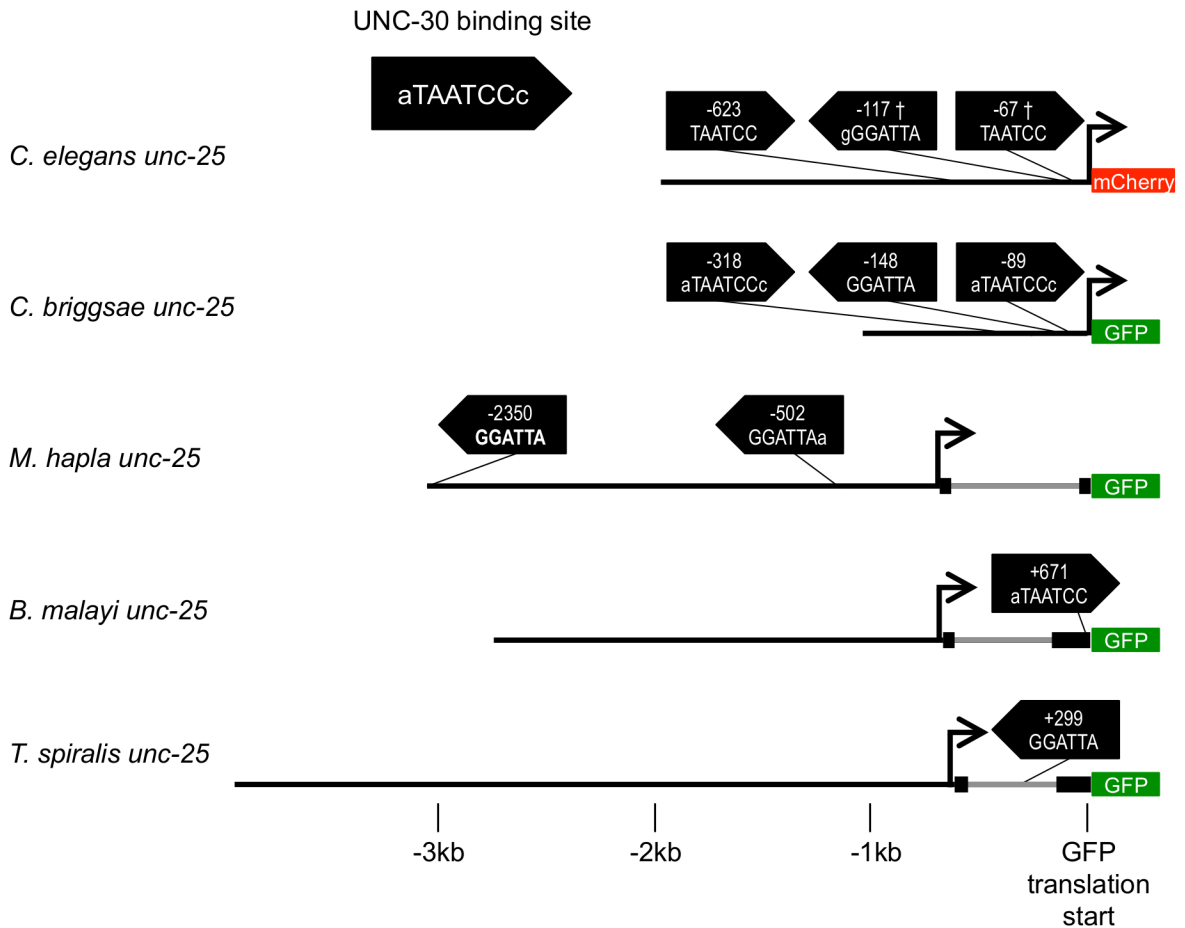

**S11 Figure. Matches to motifs responsible for the *C. elegans unc-25* gene expression pattern can be found in orthologous sequences.** Cartoons depicting all orthologous upstream *unc-25* sequences fused to *mCherry* (*C. elegans*) or *GFP* (all others) near the translation start site (bent arrow), or further downstream. Exons are thick black boxes, introns are gray lines. UNC-30 (box arrow) consensus motifs are shown above, in uppercase letters; conserved flanking nucleotides shown in lowercase. Locations of motifs relative to the endogenous translation start site are indicated. Daggers denote binding sites found to be bound by UNC-30. See S1 Text.
