# Supplementary material for: Phylum-Level Conservation of Regulatory Information in Nematodes despite Extensive Non-coding Sequence Divergence
Source: PubMed Central journal article supplement (PMC4447282; doi:10.1371/journal.pgen.1005268), 2015-05-28
Supplement: pgen.1005268.s012.pdf [file pgen.1005268.s012.pdf]

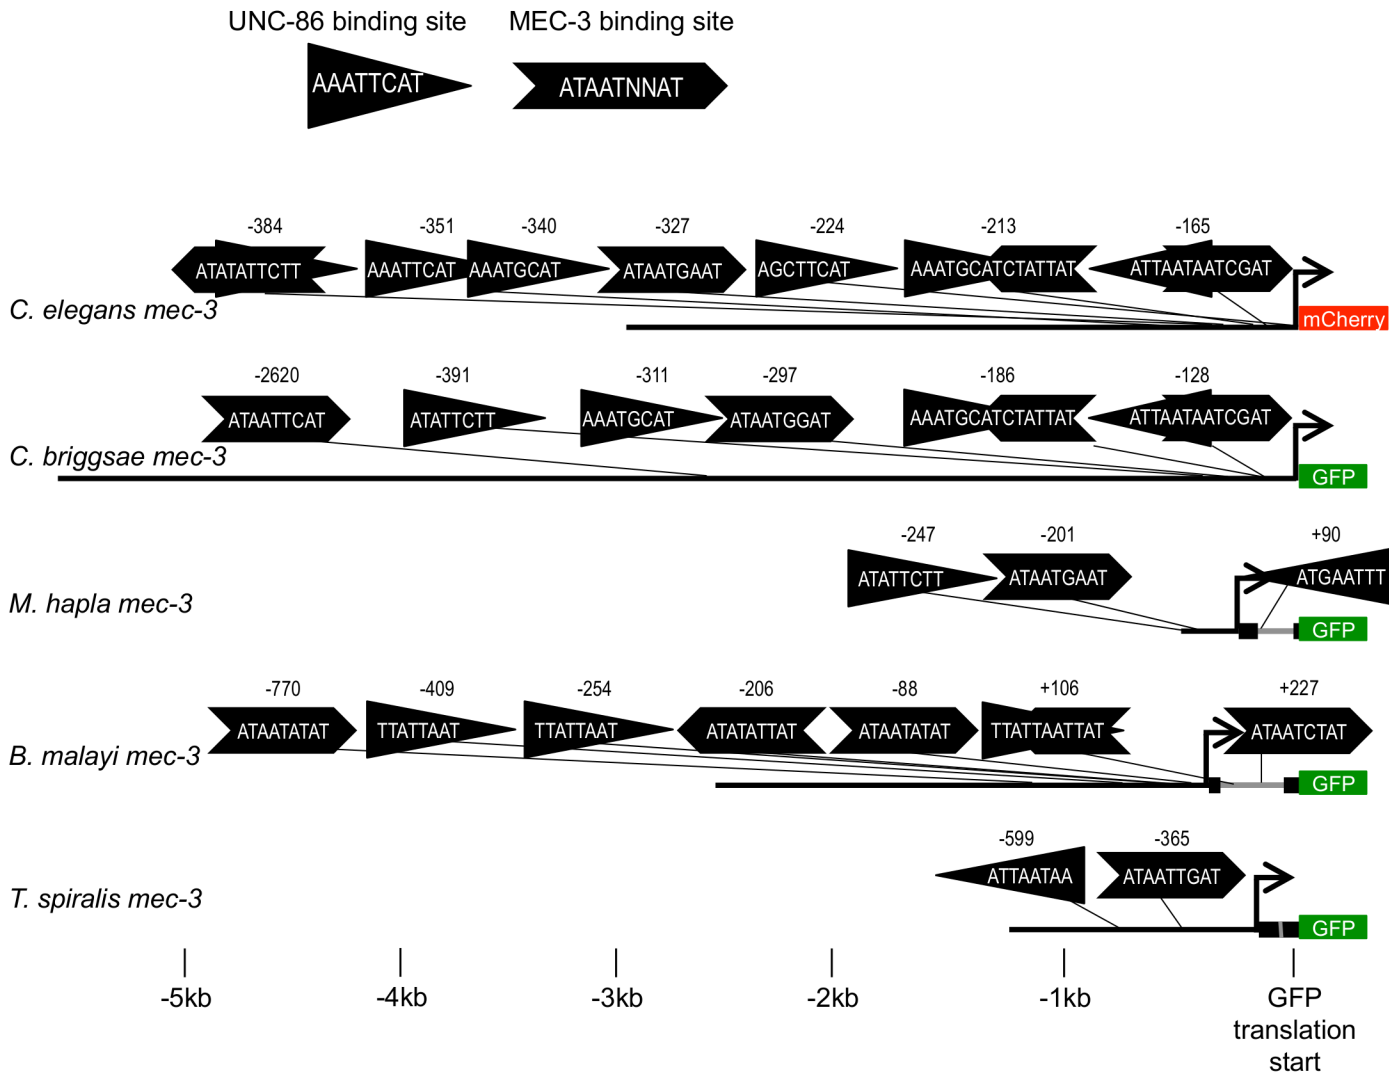

**S12 Figure. Matches to motifs responsible for the *C. elegans mec-3* gene expression pattern can be found in orthologous sequences.**

Cartoons depicting the all orthologous upstream *mec-3* sequences fused to *GFP* near the translation start site (bent arrow) or further downstream. Exons are thick black boxes, introns are gray lines. UNC-86 (triangle) and MEC-3 (fletched arrow) consensus motifs are shown above. Locations of motifs relative to the endogenous translation start site are indicated. Several distal motifs are omitted from *C. elegans*, *C. briggsae*, and *B. malayi*. See S1 Text.
