# Supplementary material for: Phylum-Level Conservation of Regulatory Information in Nematodes despite Extensive Non-coding Sequence Divergence
Source: PubMed Central journal article supplement (PMC4447282; doi:10.1371/journal.pgen.1005268), 2015-05-28
Supplement: pgen.1005268.s013.pdf [file pgen.1005268.s013.pdf]

extended GATA site

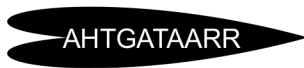

generic GATA site

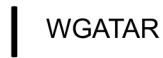

*C. elegans elt-2*

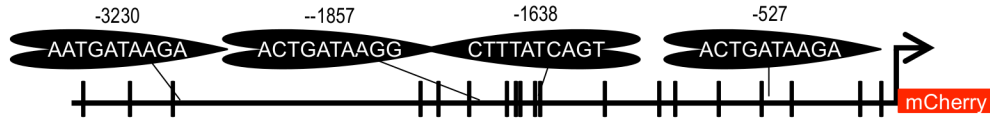

*C. briggsae elt-2*

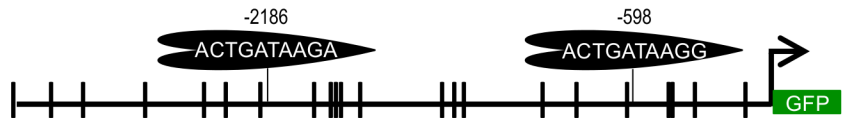

*M. hapla elt-2*

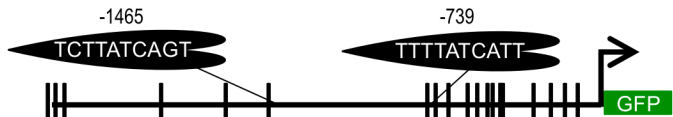

*B. malayi elt-2*

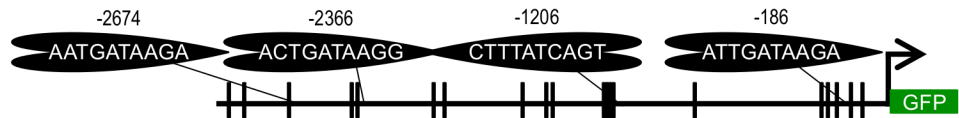

*T. spiralis elt-2*

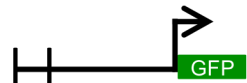

-4kb

-3kb

-2kb

-1kb

GFP  
translation  
start

**S13 Figure. Matches to motifs responsible for the *C. elegans elt-2* gene expression pattern can be found in orthologous sequences.** Cartoons depicting the all orthologous upstream *elt-2* sequences fused to *GFP* near the translation start site (bent arrow). Gut-enriched extended GATA motif (sideways heart) and generic GATA motif (vertical lines) are shown above. Locations of motifs relative to the endogenous translation start site are indicated. See S1 Text.
