# Supplementary material for: Phylum-Level Conservation of Regulatory Information in Nematodes despite Extensive Non-coding Sequence Divergence
Source: PubMed Central journal article supplement (PMC4447282; doi:10.1371/journal.pgen.1005268), 2015-05-28
Supplement: pgen.1005268.s014.pdf [file pgen.1005268.s014.pdf]

A

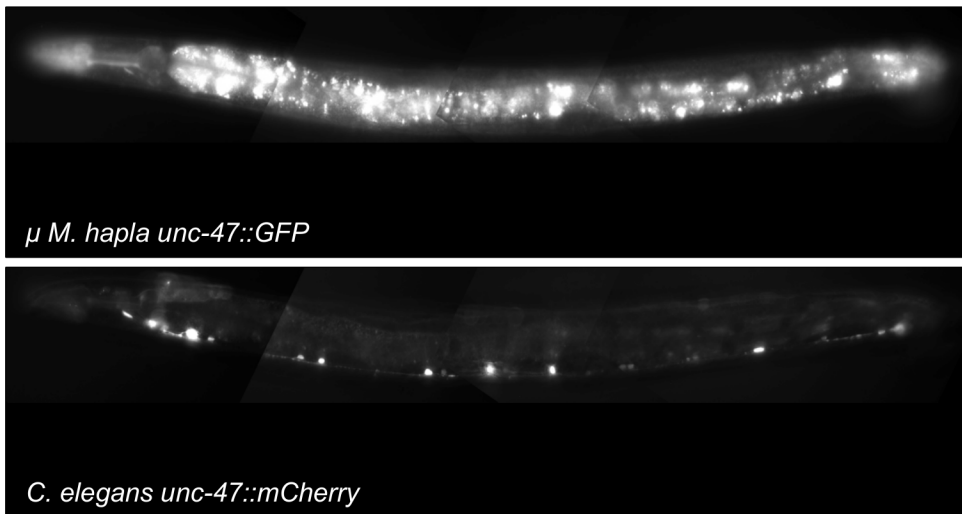

B

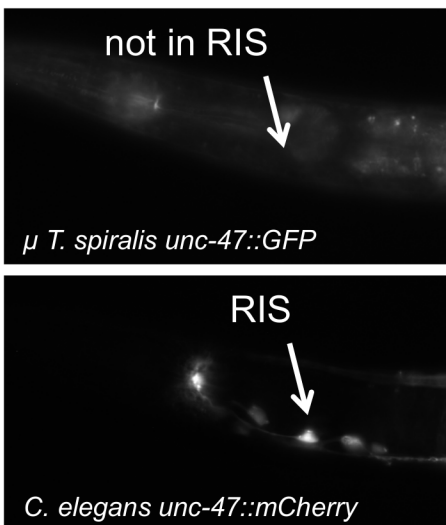

C

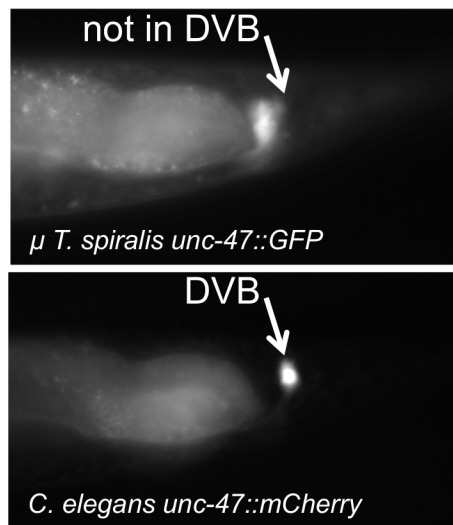

**S14 Figure. Mutations to putative transcription factor binding sites in orthologous *cis*-regulatory sequences disrupt their functions.** (A) Mutant *M. hapla unc-47* element drives expression of *GFP*. *C. elegans unc-47* regulatory sequence drives expression of *mCherry*. Images are mosaics of single animals. Mutant *T. spiralis unc-47* regulatory element drives expression of *GFP*, but not consistently in RIS (B) or DVB (C).  $\mu$  denotes mutated *unc-47 cis* elements. *C. elegans unc-47* regulatory sequence drives expression of *mCherry* in these cells. All animals photographed at 400x magnification.
