# Supplementary material for: Phylum-Level Conservation of Regulatory Information in Nematodes despite Extensive Non-coding Sequence Divergence
Source: PubMed Central journal article supplement (PMC4447282; doi:10.1371/journal.pgen.1005268), 2015-05-28
Supplement: pgen.1005268.s015.pdf [file pgen.1005268.s015.pdf]

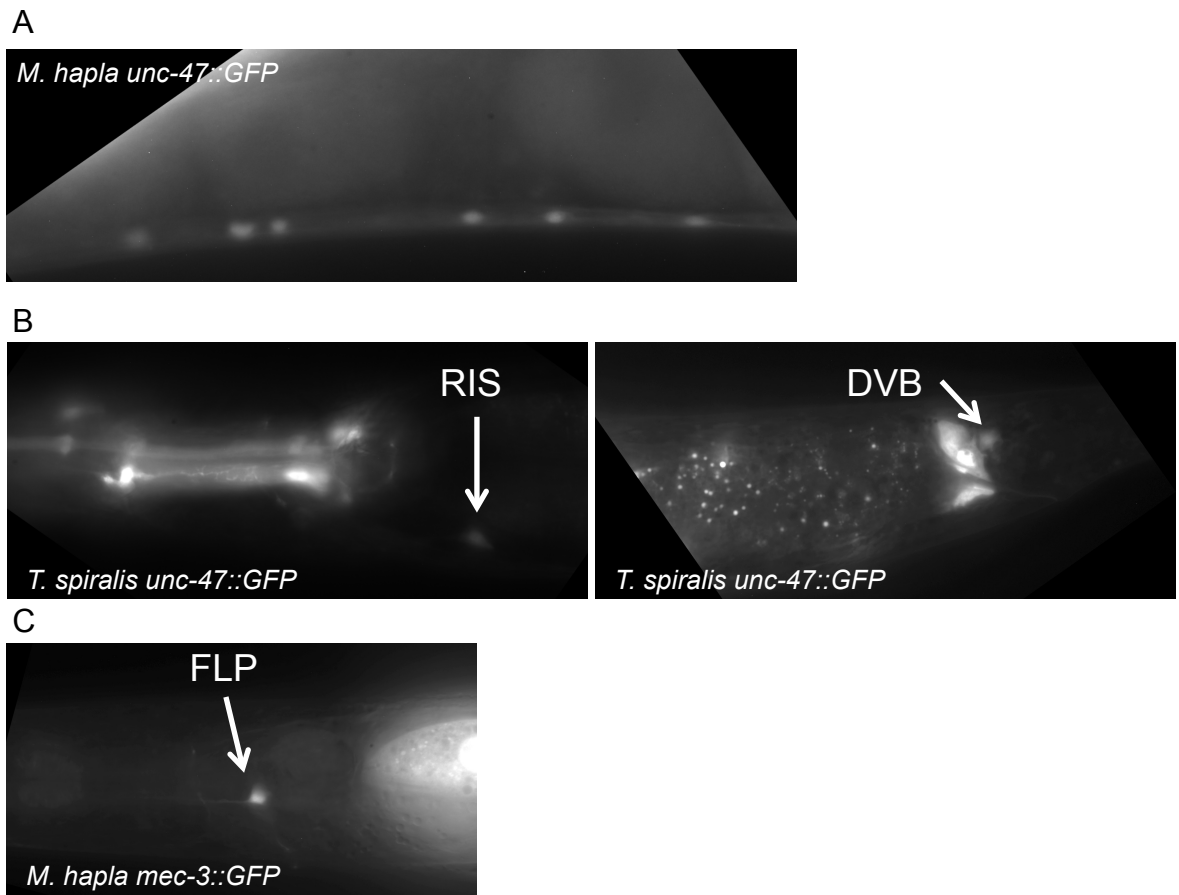

**Figure S15.** GFP expression driven by *cis* elements from distant relatives in the appropriate cells is detected when not coexpressed with mCherry. (A) *M. hapla unc-47::GFP* is expressed in several D-type neurons of the ventral cord. (B) *T. spiralis unc-47::GFP* is expressed in RIS and DVB. (C) *M. hapla mec-3::GFP* is expressed in the head neuron FLP. All images taken at 1000x magnification.
